# Supplementary material
Source: PubMed Central journal article supplement (PMC2862139)
Supplement: NIHMS169649-supplement-1.pdf [file NIHMS169649-supplement-1.pdf]

Fig. S1a

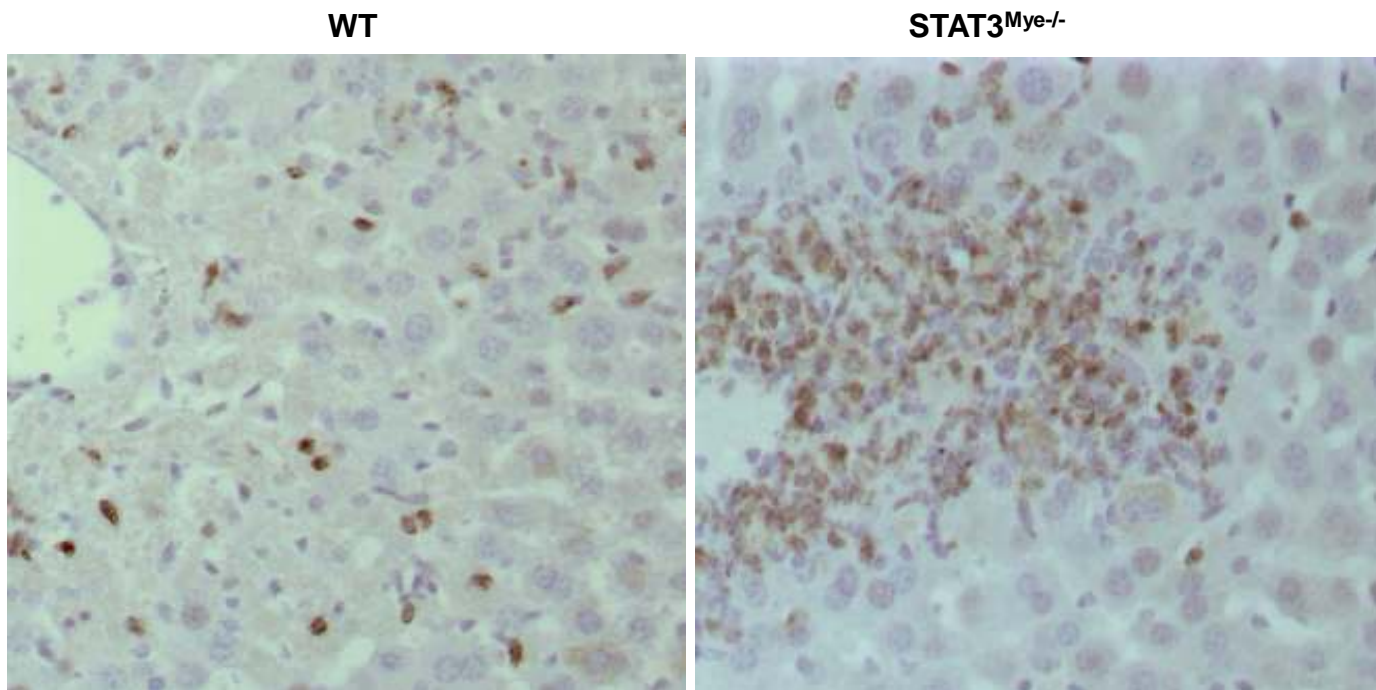

**Fig. S1a:** Wild-type and STAT3<sup>Myc-/-</sup> mice were injected with CCl<sub>4</sub> and sacrificed 24 h post injection. Liver tissues were stained with anti-MPO (myeloperoxidase) antibody for neutrophils (MPO positive brown staining). These neutrophils are either located within the sinusoids or infiltrated into the liver parenchyma. (original amplification x600)

Fig. S1b

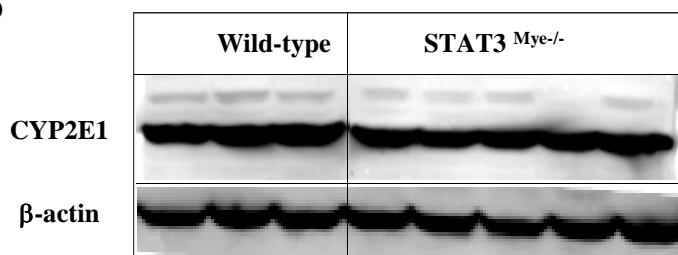

**Fig. S1b:** Basal expression of CYP2E1 in wild-type and STAT3<sup>Myc-/-</sup> mice.

Fig. S1c

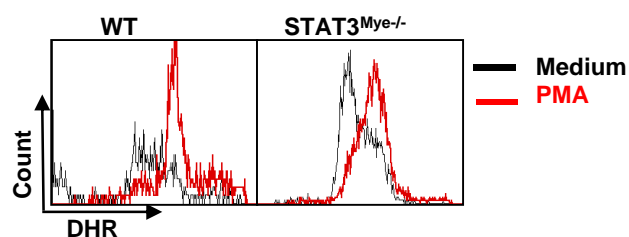

**Fig. S1c:** Liver leukocytes were analyzed for oxidation of dihydrorhodamine (DHR) by flow cytometric analyses with or without PMA treatment. A representative graph from 3 independent experiments with similar results is shown.

Fig. S2a

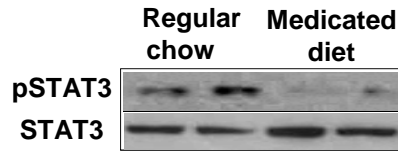

Fig. S2b

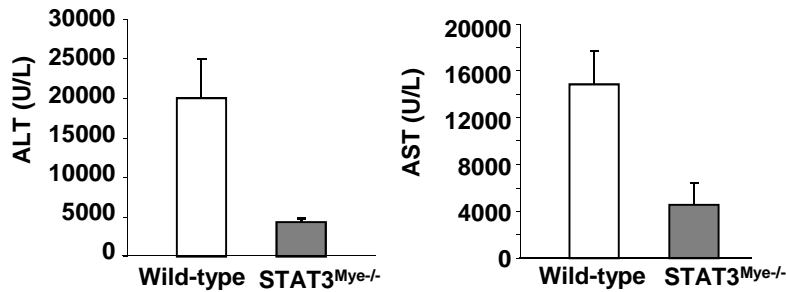

**Fig. S2:** **a:** STAT3<sup>Myc-/-</sup> mice were fed a regular chow or a medicated diet for 4 weeks. The liver tissues were collected for Western blot analyses with anti-phospho-STAT3 and anti-STAT3 antibodies. **b:** wild-type and STAT3<sup>Myc-/-</sup> mice were fed a medicated diet for 4 weeks, followed by administration of CCl<sub>4</sub>. Serum levels of ALT and AST were measured 24 hours post CCl<sub>4</sub> treatment.

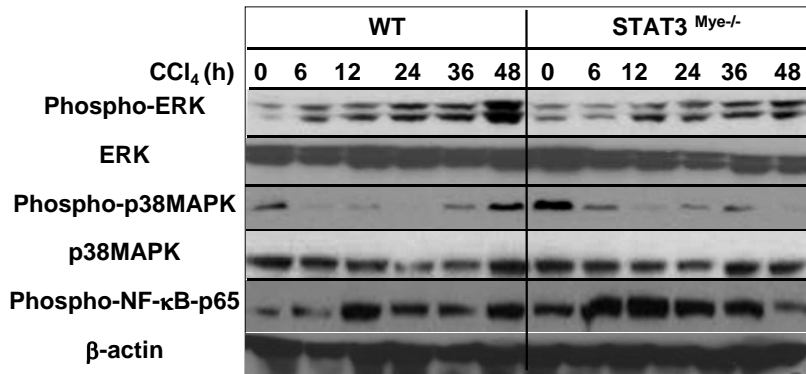

**Fig. S3:** Western blot analyses of liver tissues from wild-type and STAT3<sup>Mye-/-</sup> mice treated with CCl<sub>4</sub>.
